# Supplementary material
Source: PubMed Central journal article supplement (PMC7734661)
Supplement: NIHMS1643238-supplement-Supplement.pdf [file NIHMS1643238-supplement-Supplement.pdf]

**Author Relationships With Industry and Other Entities (Comprehensive)—2019 ACC/AHA Guideline on the Primary Prevention of Cardiovascular Disease Guideline (August 2018)**

| <b>Committee Member</b>                 | <b>Employment</b>                                                                                                    | <b>Consultant</b> | <b>Speakers Bureau</b> | <b>Ownership/ Partnership/ Principal</b> | <b>Personal Research</b> | <b>Institutional, Organizational, or Other Financial Benefit</b> | <b>Expert Witness</b> |
|-----------------------------------------|----------------------------------------------------------------------------------------------------------------------|-------------------|------------------------|------------------------------------------|--------------------------|------------------------------------------------------------------|-----------------------|
| Donna K. Arnett ( <i>Co-Chair</i> )     | University of Kentucky College of Public Health—Dean and Professor of Epidemiology                                   | None              | None                   | None                                     | None                     | None                                                             | None                  |
| Roger S. Blumenthal ( <i>Co-Chair</i> ) | Johns Hopkins University—Professor of Medicine and Director, Ciccarone Center for the Prevention of Heart Disease    | None              | None                   | None                                     | None                     | None                                                             | None                  |
| Michelle A. Albert                      | UCSF School of Medicine—Professor of Medicine and Director, UCSF NURTURE Center                                      | None              | None                   | None                                     | None                     | None                                                             | None                  |
| Andrew B. Buroker                       | Faegre Baker Daniels LLP, Partner                                                                                    | None              | None                   | None                                     | None                     | None                                                             | None                  |
| Zachary D. Goldberger                   | University of Wisconsin School of Medicine and Public Health—Associate Professor of Medicine, Division of Cardiology | None              | None                   | None                                     | None                     | None                                                             | None                  |

|                         |                                                                                                                                                                                                                                                  |      |      |      |                                                                                                   |      |      |
|-------------------------|--------------------------------------------------------------------------------------------------------------------------------------------------------------------------------------------------------------------------------------------------|------|------|------|---------------------------------------------------------------------------------------------------|------|------|
| Ellen J. Hahn           | University of Kentucky<br>College of Nursing—<br>Professor & Director,<br>BREATHE, Deputy Director,<br>UK-CARES & Leader, and<br>Community Engagement<br>Core; Marcia A. Dake<br>Professor of Nursing                                            | None | None | None | None                                                                                              | None | None |
| Cheryl D.<br>Himmelfarb | Johns Hopkins School of<br>Nursing—Professor;<br>Associate Dean Research,<br>Office for Science and<br>Innovation; and Deputy<br>Director, Johns Hopkins<br>Institute for Clinical and<br>Translational Research                                 | None | None | None | <ul style="list-style-type: none"> <li>• Helene Fuld<br/>Health Trust*</li> <li>• NIH*</li> </ul> | None | None |
| Amit Khera              | UT Southwestern School of<br>Medicine—Professor of<br>Internal Medicine and<br>Director, Preventive<br>Cardiology Program                                                                                                                        | None | None | None | None                                                                                              | None | None |
| Donald Lloyd-<br>Jones  | Northwestern University—<br>Eileen M. Foell Professor;<br>Senior Associate Dean for<br>Clinical and Translational<br>Research; Chair, Department<br>of Preventive Medicine; and<br>Director, Clinical and<br>Translational Sciences<br>Institute | None | None | None | None                                                                                              | None | None |

|                    |                                                                                                                                                                                                                                                            |                                                                         |      |      |                                                                                                                   |      |      |
|--------------------|------------------------------------------------------------------------------------------------------------------------------------------------------------------------------------------------------------------------------------------------------------|-------------------------------------------------------------------------|------|------|-------------------------------------------------------------------------------------------------------------------|------|------|
| J. William McEvoy  | National University of Ireland, Galway Campus—Professor of Preventive Cardiology; National Institute for Preventive Cardiology, Galway—Medical and Research Director; and University Hospital Galway, Ireland—Consultant Cardiologist.                     | None                                                                    | None | None | <ul style="list-style-type: none"> <li>• Abbott Laboratories*</li> <li>• Instrumentation Laboratories*</li> </ul> | None | None |
| Erin D. Michos     | Johns Hopkins School of Medicine—Associate Professor of Medicine and Associate Director of Preventive Cardiology, Ciccarone Center for the Prevention of Heart Disease Johns Hopkins Bloomberg School of Public Health—Associate Professor of Epidemiology | <ul style="list-style-type: none"> <li>• BioQuest Global CME</li> </ul> | None | None | <ul style="list-style-type: none"> <li>• NIH*</li> </ul>                                                          | None | None |
| Michael D. Miedema | Minneapolis Heart Institute—Director of Cardiovascular Prevention                                                                                                                                                                                          | None                                                                    | None | None | None                                                                                                              | None | None |
| Daniel Muñoz       | Vanderbilt University Medical Center—Assistant Professor of Medicine, Division of Cardiology; Medical Director for Quality, Vanderbilt Heart & Vascular Institute; Associate Medical Director, Cardiovascular ICU                                          | None                                                                    | None | None | None                                                                                                              | None | None |

|                     |                                                                                                                                                                                                                                                                                                                                |      |      |      |                                                                                                                                        |                                                                                                |      |
|---------------------|--------------------------------------------------------------------------------------------------------------------------------------------------------------------------------------------------------------------------------------------------------------------------------------------------------------------------------|------|------|------|----------------------------------------------------------------------------------------------------------------------------------------|------------------------------------------------------------------------------------------------|------|
| Sidney C. Smith, Jr | University of North Carolina, Chapel Hill—Professor of Medicine, Division of Cardiology                                                                                                                                                                                                                                        | None | None | None | None                                                                                                                                   | None                                                                                           | None |
| Salim S. Virani     | Baylor College of Medicine—Professor, Section of Cardiovascular Research and Director for Research, Cardiology Fellowship Training Program Michael E. DeBakey VA Medical Center—Staff Cardiologist and Investigator, Health Policy, Quality & Informatics Program, Center for Innovations in Quality, Effectiveness and Safety | None | None | None | <ul style="list-style-type: none"> <li>• ADA*</li> <li>• AHA*</li> <li>• Baylor College of Medicine*</li> <li>• Dept of VA*</li> </ul> | <ul style="list-style-type: none"> <li>• ACC*</li> <li>• National Lipid Association</li> </ul> | None |
| Kim A. Williams, Sr | Rush Medical College—James B. Herrick Professor and Chief, Division of Cardiology, Department of Internal Medicine                                                                                                                                                                                                             | None | None | None | None                                                                                                                                   | None                                                                                           | None |
| Joseph Yeboah       | Wake Forest Baptist Health—Associate Professor, Internal Medicine, Cardiovascular                                                                                                                                                                                                                                              | None | None | None | None                                                                                                                                   | None                                                                                           | None |
| Boback Ziaeian      | University of California at Los Angeles, David Geffen School of Medicine—Clinical Instructor, Division of Cardiology                                                                                                                                                                                                           | None | None | None | None                                                                                                                                   | None                                                                                           | None |

This table represents all relationships of committee members with industry and other entities that were reported by authors, including those not deemed to be relevant to this document, at the time this document was under development. The table does not necessarily reflect relationships with industry at the time of

publication. A person is deemed to have a significant interest in a business if the interest represents ownership of  $\geq 5\%$  of the voting stock or share of the business entity, or ownership of  $\geq \$5,000$  of the fair market value of the business entity; or if funds received by the person from the business entity exceed 5% of the person's gross income for the previous year. Relationships that exist with no financial benefit are also included for the purpose of transparency. Relationships in this table are modest unless otherwise noted. Please refer to <http://www.acc.org/guidelines/about-guidelines-and-clinical-documents/relationships-with-industry-policy> for definitions of disclosure categories or additional information about the ACC/AHA Disclosure Policy for Writing Committees.

\*Significant relationship.

ACC indicates American College of Cardiology; ADA, American Diabetes Association; AHA, American Heart Association; ICU, Intensive Care Unit; NIH, National Institutes of Health; UCSF, University of California, San Francisco; UT, University of Texas; and VA, Veterans Affairs.
